# Supplementary material for: A targeted next-generation sequencing method for identifying clinically relevant mutation profiles in lung adenocarcinoma
Source: PubMed Central journal article supplement (PMC4776238; doi:10.1038/srep22338), 2016-03-03
Supplement: srep22338-s1.pdf [file srep22338-s1.pdf]

# Title

A targeted next-generation sequencing method for identifying clinically relevant mutation profiles in lung adenocarcinoma

## Author and affiliation

Di Shao<sup>1,2,3\*</sup>, Yongping Lin<sup>4,5,6\*</sup>, Jilong Liu<sup>1</sup>, Liang Wan<sup>1</sup>, Zu Liu<sup>1</sup>, Shaomin Cheng<sup>1</sup>, Lingna Fei<sup>1</sup>, Rongqing Deng<sup>1</sup>, Jian Wang<sup>1</sup>, Xi Chen<sup>1</sup>, Liping Liu<sup>6</sup>, Xia Gu<sup>6</sup>, Wenhua Liang<sup>6</sup>, Ping He<sup>6</sup>, Jun Wang<sup>2</sup>, Mingzhi Ye<sup>1,2,3†</sup>, Jianxing He<sup>6†</sup>

1 BGI-Shenzhen, Shenzhen, 518083, China

2 Department of Biology, University of Copenhagen, Copenhagen, DK-2200, Denmark

3 BGI-Guangzhou, Guangzhou Key Laboratory of Cancer Trans-Omics Research, Guangzhou, 510006, China

4 Department of Laboratory Medicine, The First Affiliated Hospital of Guangzhou Medical University, Guangzhou, 510120, China

5 Centre of Translational Medicine, The First Affiliated Hospital of Guangzhou Medical University, Guangzhou, 510120, China

6 The First Affiliated Hospital of Guangzhou Medical University, Guangzhou, 510120, China

\*These authors contribute equally to the work

†Correspondence should be addressed to [hejx@vip.163.com](mailto:hejx@vip.163.com) and [yemingzhi@genomics.cn](mailto:yemingzhi@genomics.cn)

## Supplementary Information

**Table S1** targeted gene list

| PART I: Actionable<br>now or in future                                                                                                                                                                                       | PARTII: Recurrent in database                                                                                                                                                                                                                                                                                                                                                                                                                                                                                                                                                                                                                                                                                                                                                                                                                                                                                                                                                                                                                                         |                                                                                                                                                                                                                                                                                                                                                                                                                                                                                                                                                                                                                                                                    |
|------------------------------------------------------------------------------------------------------------------------------------------------------------------------------------------------------------------------------|-----------------------------------------------------------------------------------------------------------------------------------------------------------------------------------------------------------------------------------------------------------------------------------------------------------------------------------------------------------------------------------------------------------------------------------------------------------------------------------------------------------------------------------------------------------------------------------------------------------------------------------------------------------------------------------------------------------------------------------------------------------------------------------------------------------------------------------------------------------------------------------------------------------------------------------------------------------------------------------------------------------------------------------------------------------------------|--------------------------------------------------------------------------------------------------------------------------------------------------------------------------------------------------------------------------------------------------------------------------------------------------------------------------------------------------------------------------------------------------------------------------------------------------------------------------------------------------------------------------------------------------------------------------------------------------------------------------------------------------------------------|
|                                                                                                                                                                                                                              | COSMIC                                                                                                                                                                                                                                                                                                                                                                                                                                                                                                                                                                                                                                                                                                                                                                                                                                                                                                                                                                                                                                                                | TCGA / ICGC                                                                                                                                                                                                                                                                                                                                                                                                                                                                                                                                                                                                                                                        |
| <i>AKT1</i> ,<br><i>EGFR</i> ,<br><i>KRAS</i> ,<br><i>NRAS</i> ,<br><i>BRAF</i> ,<br><i>FGFR1</i> ,<br><i>PIK3CA</i> ,<br><i>DDR2</i> ,<br><i>NTRK1</i> ,<br><i>PTEN</i> ,<br><i>HER2</i> ,<br><i>ALK</i> ,<br><i>ROS1</i> , | <i>CDKN2A</i> , <i>STK11</i> , <i>KEAP1</i> , <i>PDGFRA</i> , <i>KLK1</i> ,<br><i>NFE2L2</i> , <i>CTNNB1</i> , <i>SMAD4</i> , <i>FGFR2</i> , <i>APC</i> ,<br><i>FBXW7</i> , <i>HRAS</i> , <i>ERBB4</i> , <i>MUC6</i> , <i>CHEK2</i> ,<br><i>NBPF10</i> , <i>PARG</i> , <i>FBN2</i> , <i>HSD17B7P2</i> , <i>NF1</i> ,<br><i>WASH2P</i> , <i>POTEC</i> , <i>EEF1B2</i> , <i>ADAM23</i> , <i>TP53</i> ,<br><i>DNMT3B</i> , <i>SDHAP2</i> , <i>DHX9</i> , <i>CSNK2A1</i> , <i>KDR</i> ,<br><i>CNTN5</i> , <i>ATXN3</i> , <i>CLIP1</i> , <i>OR4M2</i> , <i>NOTCH1</i> ,<br><i>OR10G8</i> , <i>PAPPA2</i> , <i>OR8H2</i> , <i>PBX2</i> , <i>FGFR3</i> ,<br><i>POLDIP2</i> , <i>SLC6A10P</i> , <i>ZNF804B</i> , <i>ZEB1</i> , <i>RB1</i> ,<br><i>GAB1</i> , <i>OR10Z1</i> , <i>CNTNAP3B</i> , <i>XIRP2</i> , <i>JAK2</i> ,<br><i>KIAA0907</i> , <i>IL32</i> , <i>TNRC6A</i> , <i>FGFR4</i> , <i>DDX11L2</i> ,<br><i>FAM135B</i> , <i>VGLL3</i> , <i>NYAP2</i> , <i>TSHZ3</i> , <i>NTRK3</i> ,<br><i>ANAPC1</i> , <i>FAM47C</i> , <i>AKAP6</i> , <i>DSPP</i> , <i>FRG1B</i> , | <i>ZFHX4</i> , <i>ZNF804A</i> , <i>DCAF4L2</i> ,<br><i>OR5D18</i> , <i>ZNF479</i> , <i>OR51V1</i> ,<br><i>OR4N2</i> , <i>OR4C15</i> , <i>OR14C36</i> ,<br><i>CROCC</i> , <i>OR2T2</i> , <i>PCDH11X</i> ,<br><i>REG3A</i> , <i>REG1B</i> , <i>DDX11</i> ,<br><i>DNAH8</i> , <i>OR2B11</i> , <i>OR4K2</i> ,<br><i>FAM47A</i> , <i>PRB2</i> , <i>CNTNAP2</i> ,<br><i>CDH10</i> , <i>CDH12</i> , <i>RALGAPB</i> ,<br><i>LRR1Q3</i> , <i>OR5L2</i> , <i>OR2T33</i> ,<br><i>RYR2</i> , <i>EPB41L4A</i> , <i>OR2M2</i> ,<br><i>OR4C16</i> , <i>KCNB2</i> , <i>STAG3L2</i> ,<br><i>OR2T34</i> , <i>LPA</i> , <i>MMP27</i> ,<br><i>VAV3</i> , <i>THSD4</i> , <i>OR4N4</i> , |

|                           |                                                                                                                                                                                          |                                                              |
|---------------------------|------------------------------------------------------------------------------------------------------------------------------------------------------------------------------------------|--------------------------------------------------------------|
| <i>RET,</i><br><i>MET</i> | <i>KRTAP5-5, ATXN1, MUC16, BEST3, KIT,</i><br><i>KRTAP4-11, ZNF814, EPHA5, EPHA3, ATM,</i><br><i>NUDT11, SNAPC4, ZNF598, PTPRD, INHBA,</i><br><i>KIAA2022, MB21D2, MAP1B, NAV3, JAK3</i> | <i>NOTCH2, FOLH1, GNA15,</i><br><i>KRTAP4-8, TBX6, WDR62</i> |
|---------------------------|------------------------------------------------------------------------------------------------------------------------------------------------------------------------------------------|--------------------------------------------------------------|

**Table S2.** Validation of with known mutations in 61 archival samples

| <b>No.</b> | <b>Mutation Type</b> | <b>Clinical Result</b> | <b>Detected by NGS</b>              | <b>Coverage(X)</b> | <b>Mutation Frequency</b> |
|------------|----------------------|------------------------|-------------------------------------|--------------------|---------------------------|
| A1         | SNV                  | <i>EGFR G719S</i>      | <i>EGFR G719S</i>                   | 224                | 36.6%                     |
| A2*        | SNV                  | <i>EGFR S768I</i>      | <i>EGFR S768I</i>                   | 878                | 7.6%                      |
| A3         | Del.                 | <i>EGFR EX19 Del.</i>  | <i>EGFR EX19 Del.</i>               | 225                | 22.2%                     |
| A4         | Del.                 | <i>EGFR EX19 Del.</i>  | <i>EGFR EX19 Del.</i>               | 531                | 30.1%                     |
| A5         | Del.                 | <i>EGFR EX19 Del.</i>  | <i>EGFR EX19 Del.</i>               | 375                | 16.3%                     |
| A6         | Del.                 | <i>EGFR EX19 Del.</i>  | <i>EGFR EX19 Del.</i>               | 523                | 26.2%                     |
| A7         | Ins.                 | <i>EGFR EX20 Ins.</i>  | <i>EGFR EX20 Ins.</i>               | 774                | 52.5%                     |
| A8         | SNV                  | <i>EGFR L861Q</i>      | <i>EGFR L861Q</i>                   | 891                | 26.3%                     |
| A9         | SNV                  | <i>EGFR L861Q</i>      | <i>EGFR L861Q</i>                   | 754                | 13.6%                     |
| A10        | SNV                  | <i>EGFR L858R</i>      | <i>EGFR L858R</i>                   | 537                | 35.2%                     |
| A11        | SNV                  | <i>EGFR L858R</i>      | <i>EGFR L858R</i>                   | 995                | 33.9%                     |
| A12        | SNV                  | <i>EGFR L858R</i>      | <i>EGFR L858R</i>                   | 1008               | 38.7%                     |
| A13        | SNV                  | <i>EGFR L858R</i>      | <i>EGFR L858R</i>                   | 1467               | 30.6%                     |
| A14        | SNV                  | <i>KRAS G12D</i>       | <i>KRAS G12D</i>                    | 288                | 34.7%                     |
| A15        | SNV                  | <i>KRAS G12D</i>       | <i>KRAS G12D</i>                    | 365                | 29.3%                     |
| A16        | SNV                  | <i>KRAS G12V</i>       | <i>KRAS G12V</i>                    | 380                | 46.6%                     |
| A17        | Fusion               | <i>ROS1 fusion</i>     | <i>ROS1 fusion</i>                  | --                 | --                        |
| A18        | Fusion               | <i>ROS1 fusion</i>     | <i>ROS1 fusion</i>                  | --                 | --                        |
| A19        | SNV                  | <i>PIK3CA E545D</i>    | <i>PIK3CA E545D/KRAS G12D</i>       | 313/313            | 27.15%/27.15%             |
| A20        | SNV                  | <i>PIK3CA H1047R</i>   | <i>PIK3CA H1047R</i>                | 152                | 9.9%                      |
| A21        | Del.                 | <i>EGFR EX19 Del.</i>  | <i>EGFR EX19 Del./PIK3CA H1047L</i> | 602/433            | 37.54%/14.87%             |

|      |        |                           |                           |           |                   |
|------|--------|---------------------------|---------------------------|-----------|-------------------|
| A22  | Del.   | EGFR EX19 Del.            | EGFR EX19 Del.            | 805       | 30.4%             |
| A23  | Del.   | EGFR EX19 Del.            | EGFR EX19 Del.            | 523       | 34.1%             |
| A24  | Del.   | EGFR EX19 Del.            | EGFR EX19 Del.            | 828       | 14.1%             |
| A25* | Del.   | EGFR EX19 Del.            | EGFR EX19 Del.            | 668       | 9.4%              |
| A26  | Del.   | EGFR EX19 Del.            | EGFR EX19 Del.            | 815       | 12.5%             |
| A27  | Del.   | EGFR EX19 Del.            | EGFR EX19 Del.            | 951       | 20.7%             |
| A28* | Del.   | EGFR EX19 Del.            | EGFR EX19 Del.            | 607       | 8.1%              |
| A29* | Del.   | EGFR EX19 Del.            | EGFR EX19 Del.            | 480       | 9.0%              |
| A30  | Del.   | EGFR EX19 Del.            | EGFR EX19 Del.            | 648       | 21.0%             |
| A31  | Del.   | EGFR EX19 Del.            | EGFR EX19 Del.            | 712       | 21.5%             |
| A32  | SNV    | EGFR L858R                | EGFR L858R                | 940       | 29.0%             |
| A33  | SNV    | EGFR L858R                | EGFR L858R                | 1268      | 14.0%             |
| A34  | SNV    | EGFR L858R                | EGFR L858R                | 912       | 19.5%             |
| A35  | SNV    | EGFR L858R                | EGFR L858R                | 901       | 13.5%             |
| A36  | SNV    | EGFR L858R                | EGFR L858R                | 831       | 26.4%             |
| A37  | SNV    | EGFR L858R                | EGFR L858R                | 971       | 14.3%             |
| A38  | SNV    | EGFR L858R                | EGFR L858R                | 1246      | 19.7%             |
| A39* | SNV    | EGFR L858R                | EGFR L858R                | 738       | 15.3%             |
| A40  | SNV    | EGFR L858R                | EGFR L858R                | 723       | 46.9%             |
| A41  | SNV    | EGFR L858R                | EGFR L858R                | 422       | 23.5%             |
| A42  | SNV    | EGFR L858R                | EGFR L858R                | 591       | 23.0%             |
| A43  | SNV    | EGFR L858R                | EGFR L858R                | 487       | 30.4%             |
| A44  | SNV    | EGFR L858R/<br>EGFR T790M | EGFR L858R/ EGFR<br>T790M | 1696/2449 | 54.48%/56.96<br>% |
| A45  | SNV    | EGFR L861Q                | EGFR L861Q                | 1520      | 23.1%             |
| A46  | SNV    | KRAS G12C                 | KRAS G12C /NRAS<br>Q61K   | 356//396  | 6.46%/11.11%      |
| A47* | SNV    | KRAS G12C                 | KRAS G12C                 | 463       | 12.1%             |
| A48  | SNV    | KRAS G12C                 | KRAS G12C                 | 445       | 36.2%             |
| A49  | SNV    | KRAS G12C                 | KRAS G12C                 | 392       | 26.8%             |
| A50  | SNV    | KRAS G12C                 | KRAS G12C                 | 409       | 17.4%             |
| A51  | SNV    | KRAS G12C                 | KRAS G12C                 | 535       | 23.6%             |
| A52  | SNV    | KRAS G12D                 | KRAS G12D                 | 387       | 20.4%             |
| A53  | SNV    | KRAS G12D                 | KRAS G12D                 | 244       | 41.4%             |
| A54  | SNV    | KRAS G12D                 | KRAS G12D                 | 225       | 28.0%             |
| A55* | SNV    | KRAS G12V                 | KRAS G12V                 | 386       | 13.2%             |
| A56  | SNV    | KRAS G12V                 | KRAS G12V                 | 305       | 21.3%             |
| A57  | SNV    | KRAS G12V                 | KRAS G12V                 | 333       | 28.8%             |
| A58  | SNV    | KRAS G12V                 | KRAS G12V                 | 300       | 17.7%             |
| A59  | Fusion | ALK++                     | EML4/ALK                  | --        | --                |
| A60  | Del.   | EGFR EX19 Del.            | EGFR EX19 Del.            | 1397      | 18.5%             |
| A61  | Fusion | RET fusion                | RET fusion                | --        | --                |

\* Targeted NGS detected mutations in samples containing only 10% to 15% tumor cells

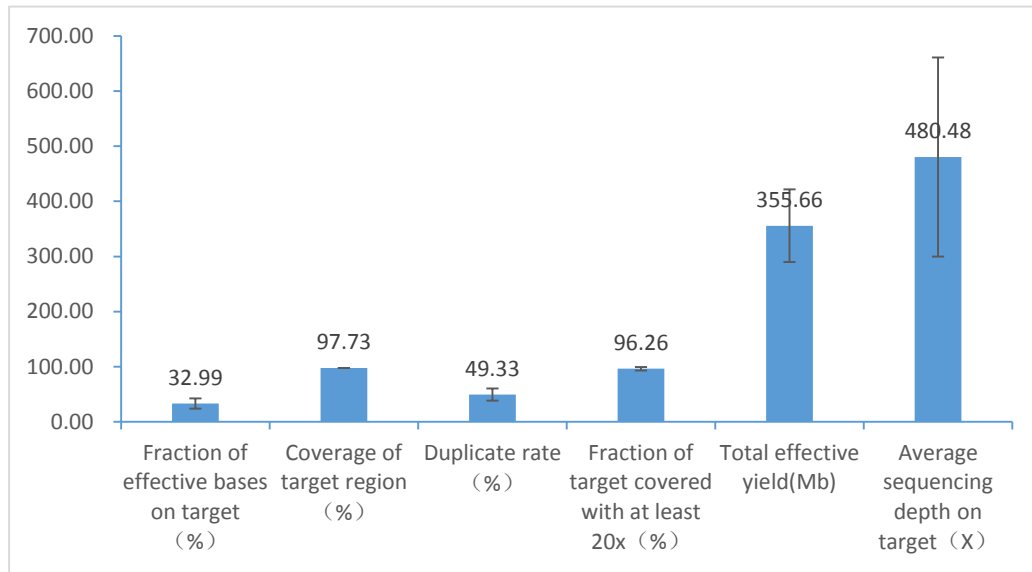

**Figure S1.** Capture performance of 119 clinical FFPE samples

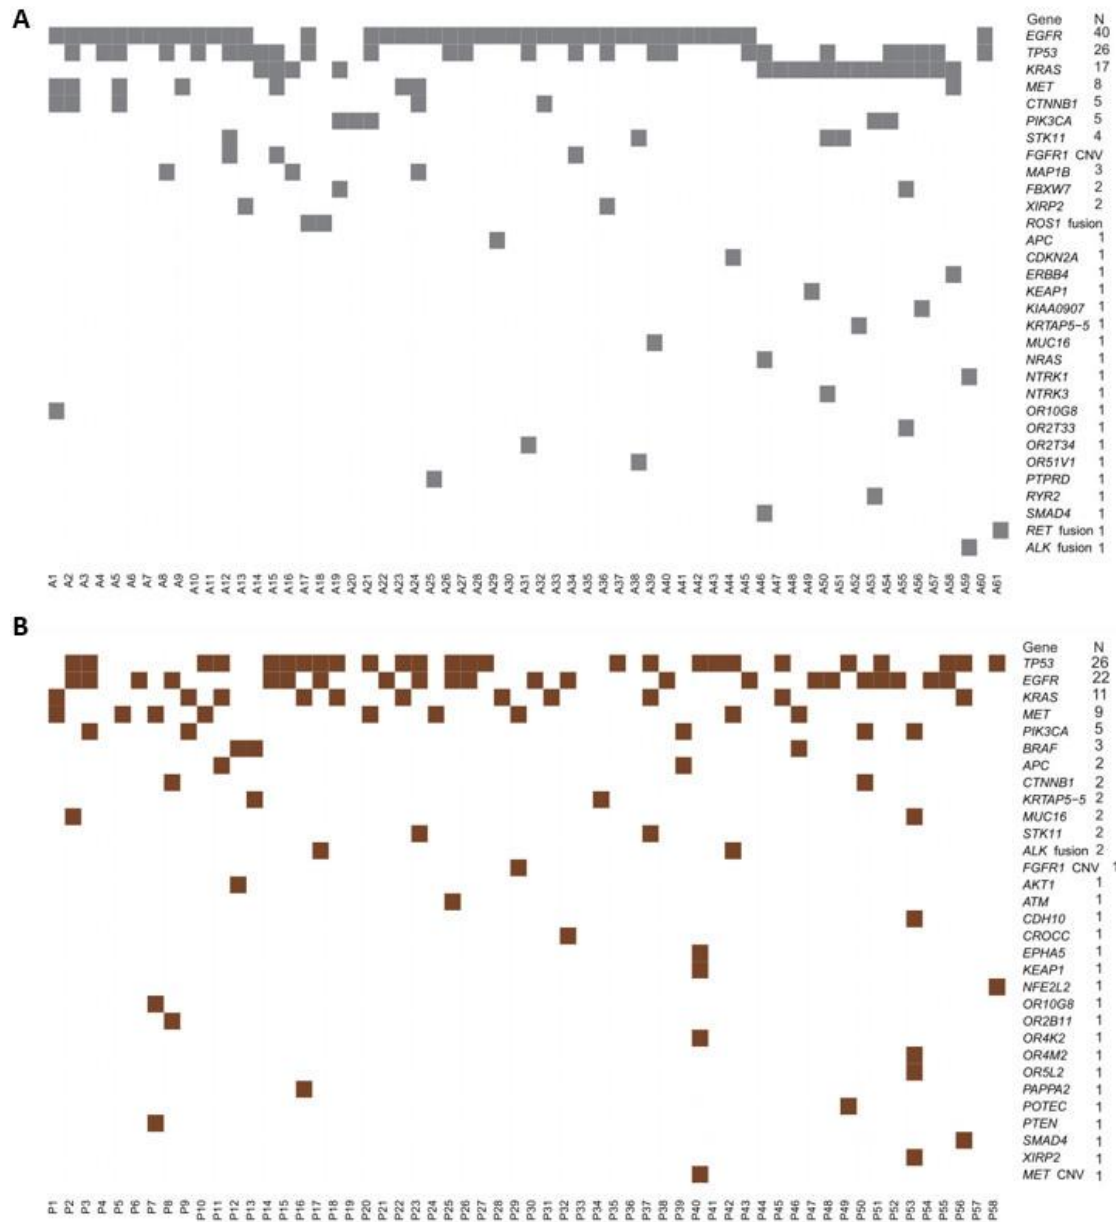

**Figure S2.** Somatic mutations identified in archival samples (A) and prospective samples (B). Each column represents 1 sample; each row represents 1 gene. The column on the right (n) indicates the number of samples with specific gene mutation
